# Supplementary material
Source: PubMed Central journal article supplement (PMC2818925)
Supplement: 0907163107_pnas.200907163SI.pdf [file 0907163107_pnas.200907163SI.pdf]

# Supporting Information

Hopkins et al. 10.1073/pnas.0907163107

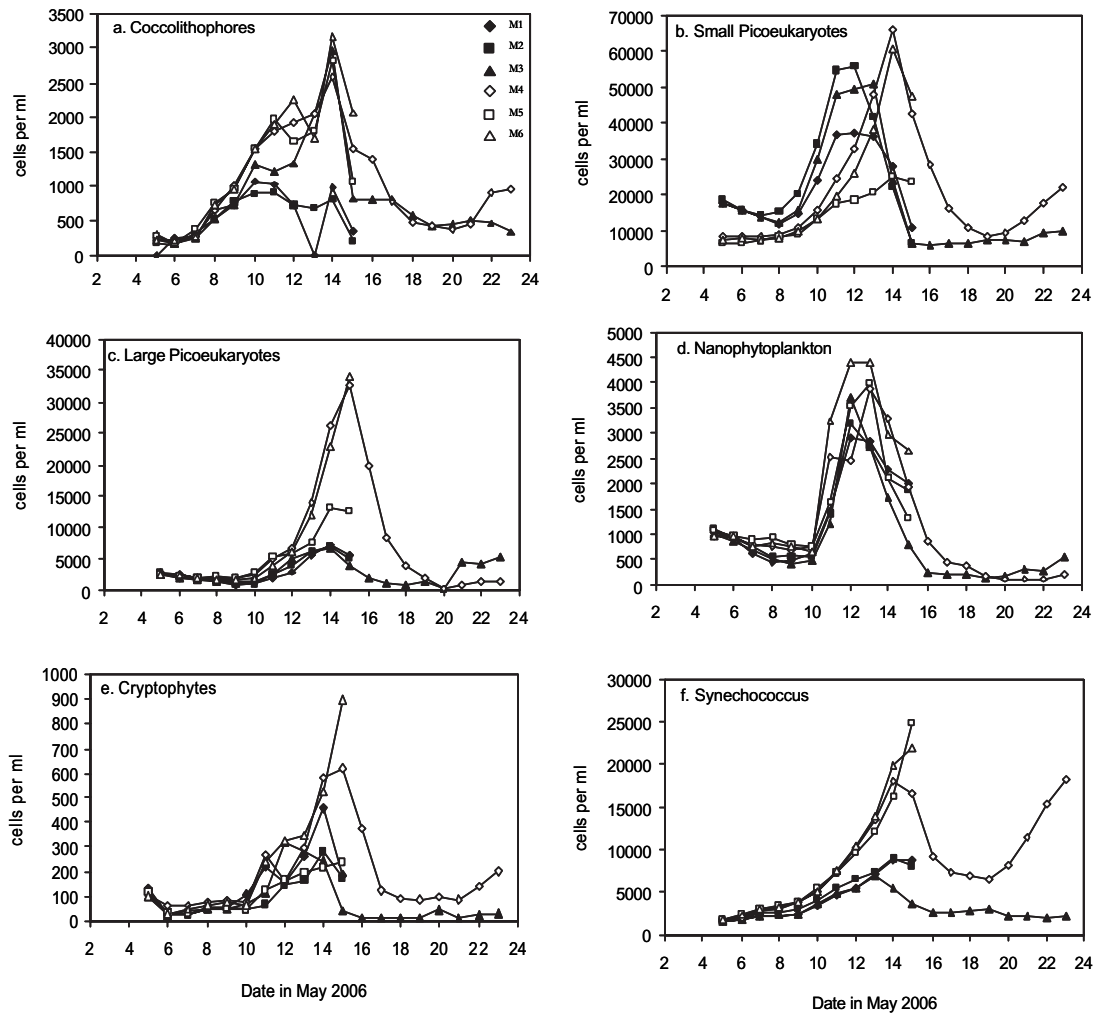

**Fig. S1.** Microplankton species cell counts (cell per milliliter). (a) Coccolithophores (b) small picoeukaryotes, (c) large picoeukaryotes, (d) nanophytoplankton, (e) cryptophytes, and (f) *Synechococcus*. Data produced by Isabelle Mary of the National Oceanography Center (NOCS) from flow cytometric analysis. Because of reaeration and alteration of experimental conditions of M1, M2, M5, and M6 on May 15, data for these mesocosms are not included. The unaltered M3 and M4 are plotted for the whole experiment. Vertical gray lines indicate the three phases of the bloom.

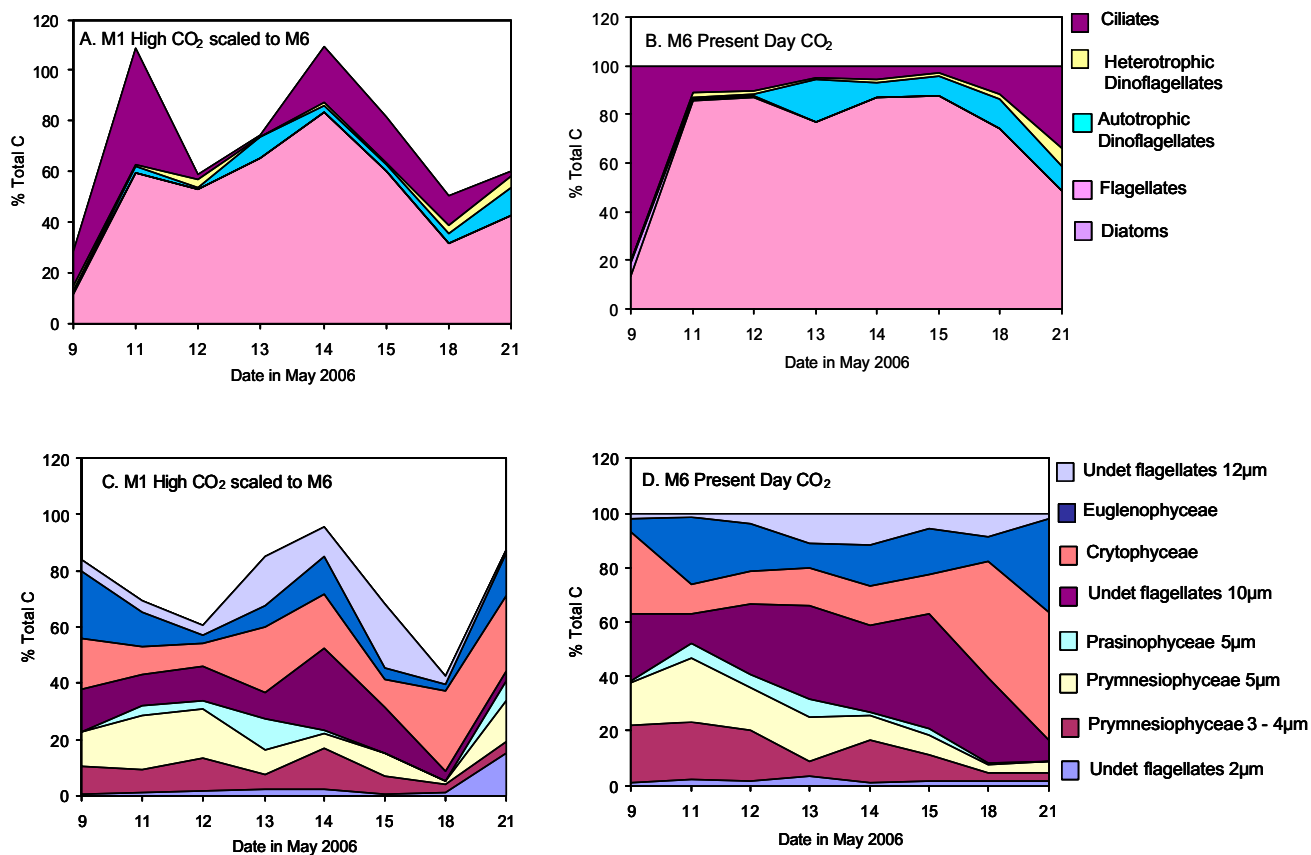

**Fig. S2.** Phytoplankton percentage biomass for overall groups (ciliates, heterotrophic dinoflagellates, autotrophic dinoflagellates, diatoms, and flagellates, A and B). Flagellates (C and D). Data provided by Claire Widdicombe (PML). Counts were made on the following days: May 9, 11, 12, 13, 14, 15, 18, and 21. Flagellates were the dominant group under both treatments: 71% of total biomass in high CO<sub>2</sub> M1 and 66% in ambient CO<sub>2</sub> M6. The flagellates under high CO<sub>2</sub> were dominated by Cryptophyceae (24%) and under the ambient control by “undetermined flagellates, 10 µm” (30%). Data for the high CO<sub>2</sub> M6 is scaled to the ambient control M1 to show how the total biomass in M1 changed in relation to M6.

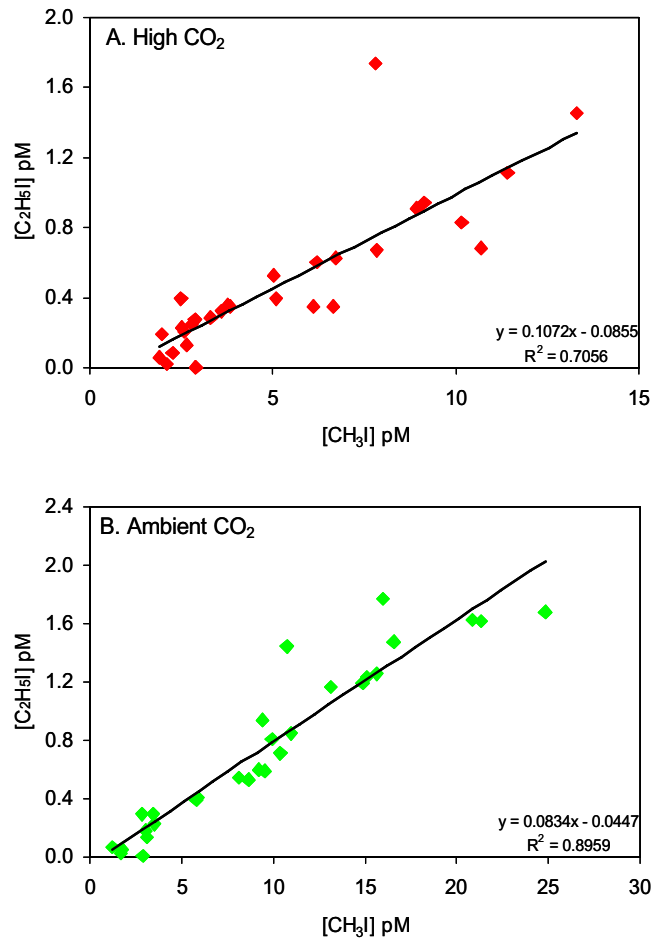

Fig. 53. Correlations between  $[CH_3I]$  and  $[C_2H_5I]$  under (A) high CO<sub>2</sub> and (B) ambient CO<sub>2</sub>. After reaeration of M1, M2, M5, and M6 on May 15, only data for M3 and M4 are plotted.

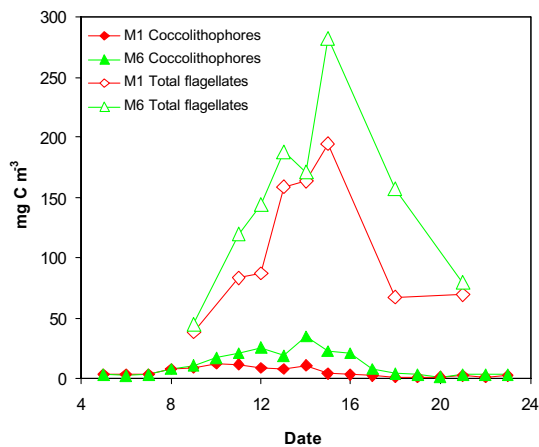

Fig. 54. Total flagellate biomass (mg C m<sup>-3</sup>) under high CO<sub>2</sub> (M1, open diamonds) and under the ambient control (M6, open triangles), and coccolithophore biomass (mg C m<sup>-3</sup>) under high CO<sub>2</sub> (M1, closed diamonds) and under the ambient control (M6, closed triangles). Coccolithophore cell counts from flow cytometric analysis were converted to biomass using the conversion factor of Menden-Deuer and Lessard [Menden-Deuer S, Lessard J (2000) Carbon to volume relationships for dinoflagellates, diatoms, and other protist plankton. *Limnol Oceanogr* 45:569–579]. Contribution of coccolithophores to total flagellate biomass is 6% under high CO<sub>2</sub> and 12% under the ambient control.

**Table S1. Summary of the statistical analyses performed on flow cytometry phytoplankton count data for Mesocosms 1 to 6**

|                                              | Mean ( $\pm$ SD)                                                                          | Data transformation | Normality: Anderson-Darling (normal $P > 0.05$ )                                          | Test of equal variances: Levene's statistic (equal $P > 0.05$ ) | Test of significance (significantly different $P < 0.05$ )                                       |
|----------------------------------------------|-------------------------------------------------------------------------------------------|---------------------|-------------------------------------------------------------------------------------------|-----------------------------------------------------------------|--------------------------------------------------------------------------------------------------|
| Coccolithophores                             | High CO <sub>2</sub> : 728.9 $\pm$ 556<br>Present CO <sub>2</sub> : 1,252 $\pm$ 802       | Square root         | High CO <sub>2</sub> : 0.458, $P = 0.250$<br>Present CO <sub>2</sub> : 0.565, $P = 0.134$ | 4.88 $P = 0.03$                                                 | <b>Two-sample <i>t</i> test</b><br><b>T = 3.17 df = 68</b><br><b><math>P = 0.002^a</math></b>    |
| Small picoeukaryotes                         | High CO <sub>2</sub> : 22,503 $\pm$ 15,303<br>Present CO <sub>2</sub> : 20739 $\pm$ 15491 | Log                 | High CO <sub>2</sub> : 0.567, $P = 0.132$<br>Present CO <sub>2</sub> : 0.849, $P = 0.026$ | 0.05 $P = 0.822$                                                | Mann-Whitney<br>W = 1,431 $P = 0.822$                                                            |
| Large picoeukaryotes                         | High CO <sub>2</sub> : 3,067 $\pm$ 2,089<br>Present CO <sub>2</sub> : 7683 $\pm$ 9098     | Log                 | High CO <sub>2</sub> : 0.906, $P = 0.019$<br>Present CO <sub>2</sub> : 0.641, $P = 0.087$ | 9.30 $P = 0.003$                                                | <b>Two-sample <i>t</i> test</b><br><b>T = -2.33 df = 59</b><br><b><math>P = 0.023^a</math></b>   |
| Large picoeukaryotes phase 2 Bloom May 10–17 | High CO <sub>2</sub> : 3,905 $\pm$ 2,128<br>Present CO <sub>2</sub> : 12157 $\pm$ 9924    | Square root         | High CO <sub>2</sub> : 0.654, $P = 0.075$<br>Present CO <sub>2</sub> : 0.496, $P = 0.189$ | 8.16 $P = 0.007$                                                | <b>Two-sample <i>t</i> test</b><br><b>T = 4.05 df = 25</b><br><b><math>P &lt; 0.001^a</math></b> |
| Nanophytoplankton                            | High CO <sub>2</sub> : 1212 $\pm$ 1,006<br>Present CO <sub>2</sub> : 1617 $\pm$ 1318      | Log                 | High CO <sub>2</sub> : 0.389, $P = 0.367$<br>Present CO <sub>2</sub> : 1.176, $P < 0.005$ | 1.07 $P = 0.305$                                                | Mann-Whitney<br>W = 1,175<br>$P = 0.1188$                                                        |
| Cryptophytes                                 | High CO <sub>2</sub> : 109.1 $\pm$ 108<br>Present CO <sub>2</sub> : 194.6 $\pm$ 194       | Log                 | High CO <sub>2</sub> : 0.634, $P = 0.091$<br>Present CO <sub>2</sub> : 0.495, $P = 0.202$ | 0.19 $P = 0.668$                                                | <b>Two-sample <i>t</i> test</b><br><b>T = 2.93 df = 72</b><br><b><math>P = 0.005^b</math></b>    |
| <i>Synechococcus</i>                         | High CO <sub>2</sub> : 4135 $\pm$ 2,286<br>Present CO <sub>2</sub> : 9126 $\pm$ 6245      | Log                 | High CO <sub>2</sub> : 1.014, $P = 0.01$<br>Present CO <sub>2</sub> : 0.513, $P = 0.182$  | 18.40 $P < 0.001$                                               | <b>Mood's median <math>\chi^2 = 9.14</math></b><br><b>df = 1 <math>P = 0.03</math></b>           |

Text in bold illustrates differences considered significant at a threshold of  $P < 0.05$ .

<sup>a</sup>*t* test performed NOT assuming equal variances considered significant at a threshold of  $P < 0.05$ .

<sup>b</sup>*t* test performed assuming equal variances.

**Table S2. Biomass (g C m<sup>-3</sup>) of ciliates, heterotrophic dinoflagellates, autotrophic dinoflagellates, diatoms, flagellates, and total biomass in high CO<sub>2</sub> M1 and present day CO<sub>2</sub> M6, and the percentage change in biomass in M1 relative to M6**

|                               | High CO <sub>2</sub> M1 (g C m <sup>-3</sup> ) | Present day CO <sub>2</sub> M6 (g C m <sup>-3</sup> ) | % difference under high CO <sub>2</sub> |
|-------------------------------|------------------------------------------------|-------------------------------------------------------|-----------------------------------------|
| Ciliates                      | 245.0                                          | 412.9                                                 | -41                                     |
| Heterotrophic dinoflagellates | 33.2                                           | 30.6                                                  | +8                                      |
| Autotrophic dinoflagellates   | 62.4                                           | 126.3                                                 | -51                                     |
| Diatoms                       | 3.7                                            | 19.6                                                  | -81                                     |
| Flagellates                   | 861.2                                          | 1185.5                                                | -27                                     |
| Total                         | 1205.6                                         | 1774.9                                                | -32                                     |



Table S4. Summary of the statistical analyses performed on data for mesocosms 1 to 6 for the period of bloom May 10 to 17

| Parameter                      | Mean                  |                          |                       | SD                       |                       |                          | Normality:<br>(Anderson-Darling)<br>$P > 0.05 =$ normal<br>distribution |                          | Transformation | Test of equal<br>variances:<br>(Levene's<br>statistic)<br>$P > 0.05 =$ equal<br>variances |             | Two-sample $t$<br>test: $P < 0.05 =$<br>significant difference<br>between means |                                 | Boxplot<br>(Similarity<br>in shape)     |                                         | Mann-Whitney<br>nonparametric test $W$ :<br>$P < 0.05 =$ significant<br>difference between<br>means |                         | Mood's Median<br>nonparametric<br>test $\chi^2$ : $P < 0.05 =$<br>significant<br>difference<br>between<br>medians |                                                                                     |                                                                                               |                                                                                               |
|--------------------------------|-----------------------|--------------------------|-----------------------|--------------------------|-----------------------|--------------------------|-------------------------------------------------------------------------|--------------------------|----------------|-------------------------------------------------------------------------------------------|-------------|---------------------------------------------------------------------------------|---------------------------------|-----------------------------------------|-----------------------------------------|-----------------------------------------------------------------------------------------------------|-------------------------|-------------------------------------------------------------------------------------------------------------------|-------------------------------------------------------------------------------------|-----------------------------------------------------------------------------------------------|-----------------------------------------------------------------------------------------------|
|                                | High<br>$\text{CO}_2$ | Ambient<br>$\text{CO}_2$ | High<br>$\text{CO}_2$ | Ambient<br>$\text{CO}_2$ | High<br>$\text{CO}_2$ | Ambient<br>$\text{CO}_2$ | High<br>$\text{CO}_2$                                                   | Ambient<br>$\text{CO}_2$ |                | $P$                                                                                       | $P$         | $P > 0.05 =$ equal<br>variances                                                 | $P > 0.05 =$ equal<br>variances | significant difference<br>between means | significant difference<br>between means | Similarity<br>in shape)                                                                             | Similarity<br>in shape) | nonparametric test $W$ :<br>$P < 0.05 =$ significant<br>difference between<br>means                               | nonparametric test $W$ :<br>$P < 0.05 =$ significant<br>difference between<br>means | nonparametric test $\chi^2$ :<br>$P < 0.05 =$ significant<br>difference<br>between<br>medians | nonparametric test $\chi^2$ :<br>$P < 0.05 =$ significant<br>difference<br>between<br>medians |
| DMS                            | 6.1                   | 14.1                     | 3.96                  | 7.46                     | 0.471                 | 0.329                    | $P = 0.217$                                                             | $P = 0.487$              | None           | 9.84                                                                                      | $P = 0.003$ | <b>4.75, df = 24, <math>P &lt; 0.001^a</math></b>                               | Not similar                     |                                         |                                         |                                                                                                     |                         |                                                                                                                   |                                                                                     |                                                                                               |                                                                                               |
| DMSp                           | 177.9                 | 243.3                    | 64.0                  | 113.8                    | 0.259                 | 0.422                    | $P = 0.675$                                                             | $P = 0.289$              | None           | 5.09                                                                                      | $P = 0.030$ | <b>2.18, df = 28, <math>P = 0.038^a</math></b>                                  | Similar                         |                                         |                                         |                                                                                                     |                         |                                                                                                                   |                                                                                     |                                                                                               |                                                                                               |
| $\text{CH}_3\text{I}$          | 6.88                  | 11.88                    | 3.28                  | 6.80                     | 0.201                 | 0.431                    | $P = 0.859$                                                             | $P = 0.271$              | None           | 8.11                                                                                      | $P = 0.008$ | <b>2.75, df = 22, <math>P = 0.012^a</math></b>                                  | Not similar                     |                                         |                                         |                                                                                                     |                         |                                                                                                                   |                                                                                     |                                                                                               |                                                                                               |
| $\text{C}_2\text{H}_5\text{I}$ | 0.64                  | 0.92                     | 0.44                  | 0.58                     | 0.496                 | 0.873                    | $P = 0.188$                                                             | $P = 0.020$              | None           | 2.36                                                                                      | $P = 0.134$ |                                                                                 |                                 |                                         |                                         |                                                                                                     |                         |                                                                                                                   |                                                                                     |                                                                                               |                                                                                               |
| $\text{CH}_2\text{I}_2$        | 203.8                 | 285.1                    | 176.5                 | 243.9                    | 0.663                 | 0.504                    | $P = 0.069$                                                             | $P = 0.176$              | None           | 2.28                                                                                      | $P = 0.140$ | 1.13, df = 33, $P = 0.265^b$                                                    |                                 |                                         |                                         |                                                                                                     |                         |                                                                                                                   |                                                                                     |                                                                                               |                                                                                               |
| $\text{CH}_2\text{ClI}$        | 174.8                 | 189.6                    | 198.2                 | 220.1                    | 1.429                 | 1.416                    | $P < 0.005$                                                             | $P < 0.005$              | None           | 0.20                                                                                      | $P = 0.621$ |                                                                                 | Similar                         |                                         |                                         |                                                                                                     |                         |                                                                                                                   |                                                                                     |                                                                                               |                                                                                               |
| $\text{CHBr}_3$                | 42.33                 | 38.85                    | 11.99                 | 11.77                    | 1.864                 | 1.229                    | $P < 0.005$                                                             | $P = 0.006$              | None           | 0.00                                                                                      | $P = 0.973$ |                                                                                 | Similar                         |                                         |                                         |                                                                                                     |                         |                                                                                                                   |                                                                                     |                                                                                               |                                                                                               |
| $\text{CH}_2\text{Br}_2$       | 1.703                 | 1.804                    | 0.86                  | 0.47                     | 0.556                 | 0.259                    | $P = 0.129$                                                             | $P = 0.671$              | None           | 5.24                                                                                      | $P = 0.029$ | 0.44, df = 26, $P = 0.667^a$                                                    |                                 |                                         |                                         |                                                                                                     |                         |                                                                                                                   |                                                                                     |                                                                                               |                                                                                               |
| $\text{CHBr}_2\text{Cl}$       | 0.52                  | 0.43                     | 0.10                  | 0.09                     | 0.390                 | 0.540                    | $P = 0.345$                                                             | $P = 0.141$              | None           | 0.50                                                                                      | $P = 0.484$ | <b>-2.82, df = 33, <math>P = 0.008^b</math></b>                                 |                                 |                                         |                                         |                                                                                                     |                         |                                                                                                                   |                                                                                     |                                                                                               |                                                                                               |
| Chl-a                          | 3.12                  | 5.22                     | 1.78                  | 3.38                     | 0.452                 | 0.664                    | $P = 0.245$                                                             | $P = 0.070$              | None           | 7.07                                                                                      | $P = 0.011$ | <b>2.45, df = 28, <math>P = 0.021^a</math></b>                                  |                                 |                                         |                                         |                                                                                                     |                         |                                                                                                                   |                                                                                     |                                                                                               |                                                                                               |

<sup>a</sup>t test performed NOT assuming equal variances considered significant at a threshold of  $P < 0.05$ .

<sup>b</sup>t test performed assuming equal variances.

**Table S5. Absolute and relative analytical error calculated from triplicate samples taken from M1 (high CO<sub>2</sub>) and M6 (ambient CO<sub>2</sub>) on alternate days**

| Compound                           | M1 mean | Absolute error (±) | Relative error % (±) | M6 mean | Absolute error (±) | Relative error % (±) |
|------------------------------------|---------|--------------------|----------------------|---------|--------------------|----------------------|
| DMS nM                             | 4.61    | 0.20               | 5.60                 | 7.02    | 0.32               | 6.33                 |
| DMSP nM                            | 149.79  | 28.26              | 16.33                | 263.16  | 47.73              | 22.91                |
| CH <sub>3</sub> I pM               | 5.01    | 0.817              | 16.71                | 9.36    | 0.47               | 10.82                |
| C <sub>2</sub> H <sub>5</sub> I pM | 0.45    | 0.091              | 17.97                | 0.80    | 0.089              | 21.71                |
| CH <sub>2</sub> I <sub>2</sub> pM  | 92.23   | 7.26               | 17.76                | 209.42  | 20.06              | 10.83                |
| CH <sub>2</sub> ClI pM             | 165.84  | 25.14              | 10.75                | 252.53  | 14.42              | 6.42                 |
| CHBr <sub>3</sub> pM               | 31.05   | 2.50               | 7.63                 | 26.49   | 1.18               | 4.79                 |
| CH <sub>2</sub> Br <sub>2</sub> pM | 2.12    | 0.44               | 25.86                | 2.14    | 0.16               | 7.16                 |
| CHBr <sub>2</sub> Cl pM            | 0.57    | 0.056              | 8.00                 | 0.43    | 0.035              | 7.83                 |
